# Supplementary material for: Chemically transformed monolayers on acene thin films for improved metal/organic interfaces
Source: Royal Society of Chemistry journal article supplement (doi:10.1039/c9cc07234a), 2019-01-01
Supplement: c9cc07234a1.pdf [file c9cc07234a1.pdf]

# SUPPORTING INFORMATION

## Chemically Transformed Monolayers on Acene Thin Films for Improved Metal/Organic Interfaces

Feifei Li,<sup>‡a</sup> Jonathan P. Hopwood,<sup>‡a</sup> Melissa M. Galey,<sup>b</sup> Laura M. Sanchez<sup>b</sup> and Jacob W. Ciszek<sup>\*a</sup>

<sup>1</sup>*Department of Chemistry and Biochemistry, Loyola University Chicago, Chicago, IL, USA, Email: jciszek@luc.edu*

<sup>2</sup>*Department of Pharmaceutical Science, University of Illinois at Chicago, Chicago, IL, USA*

*‡ These authors contributed equally to this work.*

### Table of Contents

|                                                                                               |            |
|-----------------------------------------------------------------------------------------------|------------|
| <b>General Experimental Methods</b>                                                           | <b>S2</b>  |
| <b>Synthetic Methods</b>                                                                      | <b>S3</b>  |
| <b>Figure S1.</b> ATR-IR spectra of the solution reference compound <b>2</b> .                | <b>S6</b>  |
| <b>Figure S2.</b> PM-IRRAS spectra of hydrolysis reaction exhibiting hydrogen bonding.        | <b>S7</b>  |
| <b>XPS Analysis of Cysteamine secondary reaction</b>                                          | <b>S8</b>  |
| <b>Figure S3.</b> O 1s and N 1s XPS spectra of cysteamine secondary reaction.                 | <b>S8</b>  |
| <b>Figure S4.</b> ATR-IR spectra of the solution reference compound <b>3</b> .                | <b>S9</b>  |
| <b>Figure S5:</b> ATR-IR spectra of the solution reference compound <b>3b</b> .               | <b>S9</b>  |
| <b>Figure S6:</b> ATR-IR spectra of the solution reference compound <b>4</b> .                | <b>S10</b> |
| <b>Figure S7:</b> SEM images of Ag electrodes on unreacted tetracene before the bending test. | <b>S11</b> |
| <b>Figure S8:</b> SEM images of Ag electrodes on unreacted tetracene after the bending test.  | <b>S12</b> |
| <b>Figure S9:</b> SEM images of Ag electrodes on reacted tetracene before the bending test.   | <b>S13</b> |
| <b>Figure S10:</b> SEM images of Ag electrodes on reacted tetracene after the bending test.   | <b>S14</b> |
| <b><sup>1</sup>H and <sup>13</sup>C NMR Spectra</b>                                           | <b>S15</b> |
| <b>XPS Survey Spectrum</b>                                                                    | <b>S23</b> |
| <b>XPS Spectra of C 1s and S 2p Regions</b>                                                   | <b>S24</b> |
| <b>References</b>                                                                             | <b>S25</b> |

## General Experimental Methods:

### *Maleic Anhydride Terminated Tetracene Thin Films*

Precursor films (maleic anhydride terminated tetracene) were prepared following previously reported procedures.<sup>1</sup> Briefly, 50 nm of sublimed grade tetracene, (>99.99%) was deposited onto freshly prepared gold slides at a rate of 1 Å/s using a home built deposition chamber at a base pressure  $< 3 \times 10^{-5}$  Torr. Thin films were terminated with maleic anhydride by placing them in a Schlenk tube with 10 mg of source material, under nitrogen, for 48 h at 40 °C, and afterwards non-chemisorbed materials were removed via vacuum.

### *Chemical Transformations of Thin Films*

Maleic anhydride terminated thin-films were placed in a drying chamber with a small vial containing the source material (~0.5 g of water or *n*-butylamine, 0.010 g of cysteamine). The drying chamber was then evacuated and filled with nitrogen three times before it was sealed. The chamber was then placed in a furnace at the appropriate temperatures (water: 70 °C, *n*-butylamine: 40 °C, cysteamine: 40 °C). Once the reaction was completed, the chamber was evacuated to less than  $10^{-2}$  Torr and the base was cooled to -78 °C to remove any vapors and physisorbed material from the film (1 h). Secondary reactions of tetracene thin-films were examined using a Bruker Optics Tensor 37 FT-IR with a polarization modulation accessory (PMA 50) and MCT detector.

### *Mass Spectrometry Analysis*

Mass spectrometry samples were reacted under similar conditions described above, with the primary difference being the larger substrate size (75×25 mm vs 30×10). After secondary reaction and IR analysis, samples were then coated with  $\alpha$ -cyano-4-hydroxycinnamic acid (CHCA) matrix via an HTX TM-sprayer from a stock solution of 5 mg/mL CHCA in 9:1 acetonitrile:water at 70 °C with a flow rate of 0.100 mL/min. Coated samples were then examined with a Bruker Autoflex Speed MALDI-TOF equipped with a smartbeam-II laser (355 nm) in positive reflectron mode (laser power: 40%; laser spot size: large; detector gain: 8×). Prior to data acquisition, the instrument was calibrated to a peptide standard (Bruker Daltonics GmbH).

### *X-ray Photoelectron Spectroscopy Analysis*

A Kratos AXIS-165 XPS was used to analyze cysteamine secondary reactions of precursor thin films. Photoelectrons were produced from a monochromatic Al X-ray source at an incident angle of 45° with a spot size of 200  $\mu$ m and a chamber pressure of  $3 \times 10^{-10}$  Torr. All acquired spectra were baselined and deconvoluted using XPSPEAK 4.1 software. A Tougaard type background subtraction was used for O1s, N1s, and S2p signals while a Shirley type background subtraction was used for C1s signals. All samples were referenced to the C1s line at 284.6 eV.<sup>2</sup>

### Bending Tests

All preparations were identical except for the thickness of the starting tetracene thin film (150 nm) and that films were deposited onto a gold coated PET substrate (rather than a gold slide). One set of samples was set aside without reaction. The remaining samples were reacted to form the maleic anhydride precursor followed by secondary reaction with cysteamine. Thermally deposited silver electrodes (80 nm) were evaporated onto the samples at a rate of 1 Å/s using a Kurt J. Lesker NANO 38 evaporator at a base pressure of  $<1 \times 10^{-6}$  Torr utilizing a Ossila shadow mask to define the electrode features (mask E291). Each set of devices was located on an area of the PET that was approximately 3 cm<sup>2</sup> in area. The bending test was performed following ASTM standard (D790)<sup>3</sup> by fixing the squares at both ends of the silver electrode, pushing both sides in form of a U-shape from 1-100 times. The bending diameter was approximately 5 mm. Each of the five silver electrodes generated (per sample) were examined under SEM and accompanying images are representative. The films were imaged using a Hitachi SU3500 scanning electron microscope at up to 18000× magnification with accelerating voltage of 1.75 kV. The film was loaded on a 45° stub holder and was then manual tilted 25°, in total 70° for all the SEM images.

### Synthetic Methods:

All reactions were run under a nitrogen atmosphere and solvents were purged unless otherwise stated. All column chromatography separations were performed on silica gel 60 (40-63 µm from BDH). Thin layer chromatography was carried out on silica gel (F<sub>254</sub>) with glass support. All NMR spectra were taken on a Varian 500 MHz spectrometer. <sup>1</sup>H and <sup>13</sup>C chemical shifts (δ) in CDCl<sub>3</sub> were referenced to tetramethylsilane. <sup>1</sup>H and <sup>13</sup>C chemical shifts (δ) in DMSO-*d*<sub>6</sub> were referenced to its residual solvent signal (2.50 and 39.51 respectively).<sup>4</sup> IR spectra were acquired on a Shimadzu IRAffinity-1S FTIR with a Pike Technologies MIRacle single reflection horizontal ATR accessory. 5,12-Dihydro-5,12-ethano-naphthacene-13,14-dicarboxylic acid anhydride (maleic anhydride adduct, **1**) was synthesized using a previous procedure.<sup>5</sup>

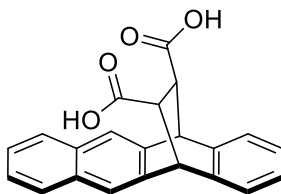

**5,12-Dihydro-5,12-ethano-naphthacene-13,14-dicarboxylic acid (2):** 5,12-Dihydro-5,12-ethano-naphthacene-13,14-dicarboxylic acid anhydride (0.0329 g, 0.101 mmol) was added to a sealed tube which was evacuated and filled with nitrogen three times. Water (0.5 mL, 27.7 mmol) and THF (1 mL) were added to the tube which was sealed and placed in an oil bath at 70 °C. After 43 h, the tube was removed from the oil bath and cooled to room temperature. The

solvent was then removed and  $\text{CH}_2\text{Cl}_2$  added to form a white precipitate that was collected via vacuum filtration. This yielded the desired diacid (**2**) as white powder (0.0129 g, 0.0374 mmol) in 37 % yield as a single isomer.  $^1\text{H}$  NMR (500 MHz,  $\text{DMSO}-d_6$ )  $\delta$  12.04 (s, 2H), 7.84-7.80 (m, 4H), 7.44 (dd,  $J = 6.2, 3.3$  Hz, 2H), 7.30 (dd,  $J = 5.3, 3.3$  Hz, 2H), 7.07 (dd,  $J = 5.4, 3.2$  Hz, 2H), 4.69 (s, 2H), 3.17 (s, 2H).  $^{13}\text{C}$  NMR (125 MHz,  $\text{DMSO}-d_6$ )  $\delta$  172.4, 140.9, 140.5, 131.6, 127.3, 125.41, 125.36, 124.9, 121.1, 47.3, 46.3. IR ( $\text{cm}^{-1}$ ) 1713, 1501, 1479, 1414, 1315, 1227, 1207, 889, 748, 673.

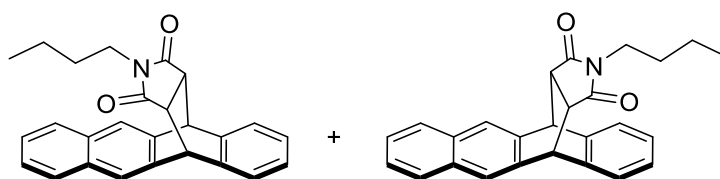

**5,12-Dihydro-5,12-ethano-naphthacene-15-*N*-butylpyrrolidine-14,16-dione (**3a**):** Tetracene (0.0448 g, 0.196 mmol) and *n*-butylmaleimide (0.0399 g, 0.260 mmol) were added to a tube which was evacuated and filled with nitrogen three times. Toluene (2 mL) was then added to the tube, which was then sealed and placed in an oil bath at 120 °C. After 48 h, the reaction was cooled to room temperature and the solvent was removed. The crude product was purified via column chromatography (1:4 EtOAc: hexanes,  $R_f$ : 0.48) to yield the imide **3a** as a white powder (0.0325 g, 0.0843 mmol) in 43% yield. Two inseparable isomers:  $^1\text{H}$  NMR (500 MHz,  $\text{CDCl}_3$ )  $\delta$  7.80-7.78 (m, 4H), 7.74-7.71 (m, 4H), 7.45 (dd,  $J = 6.1, 3.2$  Hz, 2H), 7.42-7.39 (m, 4H), 7.31 (dd,  $J = 5.4, 3.4$  Hz, 2H), 7.19 (dd,  $J = 5.6, 3.2$  Hz, 2H), 7.14 (dd,  $J = 5.4, 2.9$  Hz, 2H), 4.91-4.88 (m, 4H), 3.27-3.25 (m, 4H), 3.13 (t,  $J = 7.1$  Hz, 2H), 3.02 (t,  $J = 6.8$  Hz, 2H), 0.84-0.79 (m, 4H), 0.71 (t,  $J = 6.6$  Hz, 3H), 0.42-0.34 (m, 4H), 0.11 (t,  $J = 6.8$  Hz, 3H).  $^{13}\text{C}$  NMR (125 MHz,  $\text{CDCl}_3$ )  $\delta$  176.7, 176.6, 141.1, 138.7, 138.2, 135.8, 132.4, 132.2, 127.49, 127.47, 127.0, 126.8, 125.9, 125.8, 125.0, 124.2, 123.4, 122.4, 46.8, 46.6, 45.4 (2), 38.4, 38.3, 29.2, 29.1, 19.7, 19.4, 13.6, 12.8. IR ( $\text{cm}^{-1}$ ) 1695, 1460, 1435, 1398, 1341, 1292, 1192, 1132, 935, 897, 849, 754, 721.

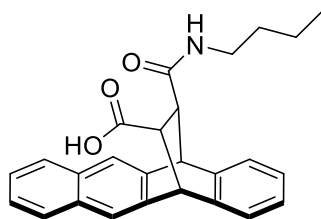

***N*-butyl-5,12-dihydronaphthacene-5,12-endo- $\alpha,\beta$ -succinamic acid (**3b**):** 5,12-Dihydro-5,12-ethano-naphthacene-13,14-dicarboxylic acid anhydride (0.0565 g, 0.173 mmol) was dissolved in  $\text{CH}_2\text{Cl}_2$  (2 mL) and cooled to 0 °C. To the resulting suspension, *N*-butylamine (0.03 mL, 0.3 mmol) in  $\text{CH}_2\text{Cl}_2$  (0.1 mL) was added dropwise. The mixture was then stirred at 0 °C for 3 h and then brought to room temperature. The pH of the solution was adjusted to 10 with 1 M NaOH and extracted with water ( $\times 3$ ). The pH of the combined aqueous layers was adjusted to 4 with 1 M HCl, which resulted in a white precipitate that was vacuum filtered. The crude product was

trituated with toluene, yielding a white powder that was collected via vacuum filtration. This produced the desired product **3b** (0.0164 g, 0.0415 mmol) in 24% yield.  $^1\text{H}$  NMR (500 MHz,  $\text{DMSO}-d_6$ )  $\delta$  7.85-7.77 (m, 5H), 7.42 (dd,  $J$  = 6.1, 3.2 Hz, 2H), 7.32 (d,  $J$  = 6.8 Hz, 1H), 7.11 (d,  $J$  = 6.4 Hz, 1H), 7.05 (t,  $J$  = 6.6 Hz, 1H), 7.00 (t,  $J$  = 6.8 Hz, 1H), 4.63 (d,  $J$  = 1.5 Hz, 1H), 4.50 (d,  $J$  = 2.5 Hz, 1H), 3.22 (dd,  $J$  = 10.7, 2.4 Hz, 1H), 2.99-2.83 (m, 3H), 1.37-1.26 (m, 4H), 0.86 (t,  $J$  = 7.1 Hz, 3H).  $^{13}\text{C}$  NMR (125 MHz,  $\text{DMSO}-d_6$ )  $\delta$  172.5, 169.6, 141.7, 140.84, 140.81, 140.5, 131.51, 131.49, 127.3, 127.2, 125.37, 125.35, 125.33, 125.1, 125.0, 124.4, 121.2, 120.8, 47.9, 47.5, 46.7, 45.1, 38.1, 31.2, 19.5, 13.7. IR ( $\text{cm}^{-1}$ ) 1711, 1670, 1643, 1562, 1437, 1381, 1321, 1256, 1207, 1165, 947, 881, 687, 665.

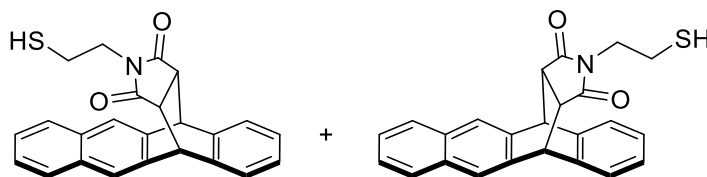

**5,12-Dihydro-5,12-ethano-naphthacene-15-N-(2-sulfanylethyl)pyrrolidine-14,16-dione (4a):**

Open to the air, 5,12-dihydro-5,12-ethano-naphthacene-13,14-dicarboxylic acid anhydride (0.1204 g, 0.3689 mmol), cysteamine (0.0380 g, 0.492 mmol), and acetic acid (5 mL) were added to a round bottom flask. The mixture was then refluxed for 8.5 h and then cooled to room temperature. The mixture was then poured into water (10 mL) to form a white precipitate. The powder was collected via vacuum filtration and rinsed with water three times. The product was dried overnight, which provided 0.1092 g (0.2847 mmol) of **4a** in 77% yield. Major Isomer:  $^1\text{H}$  NMR (500 MHz,  $\text{CDCl}_3$ )  $\delta$  7.81-7.78 (m, 4H), 7.46 (dd,  $J$  = 6.1, 3.2 Hz, 2H), 7.32 (dd,  $J$  = 5.4, 3.4 Hz, 2H), 7.17 (dd,  $J$  = 5.4, 2.9 Hz, 2H), 4.91 (s, 2H), 3.34-3.28 (m, 4H), 1.88 (q,  $J$  = 7.8 Hz, 2H), 1.04 (t,  $J$  = 9.3 Hz, 1H).  $^{13}\text{C}$  NMR (125 MHz,  $\text{CDCl}_3$ )  $\delta$  176.2, 138.3, 132.2, 127.2, 126.0, 125.0, 124.2, 122.5, 46.6, 45.4, 41.4, 20.8. Minor Isomer:  $^1\text{H}$  NMR (500 MHz,  $\text{CDCl}_3$ )  $\delta$  7.74 (dd,  $J$  = 5.9, 3.4 Hz, 2H), 7.72 (s, 2H), 7.44-7.41 (m, 4H), 7.20 (dd,  $J$  = 5.4, 2.9 Hz, 2H), 4.90 (s, 2H), 3.34-3.28 (m, 2H), 3.19 (t,  $J$  = 7.6 Hz, 2H), 1.64-1.58 (m, 2H), 0.68 (t,  $J$  = 8.5 Hz, 1H).  $^{13}\text{C}$  NMR (125 MHz,  $\text{CDCl}_3$ )  $\delta$  176.3, 140.9, 138.2, 135.7, 132.2, 127.4, 126.9, 126.1, 123.4, 46.8, 45.4, 41.2, 20.5. IR (mixture,  $\text{cm}^{-1}$ ) 1771, 1695, 1437, 1395, 1337, 1260, 1155, 893, 847, 764.

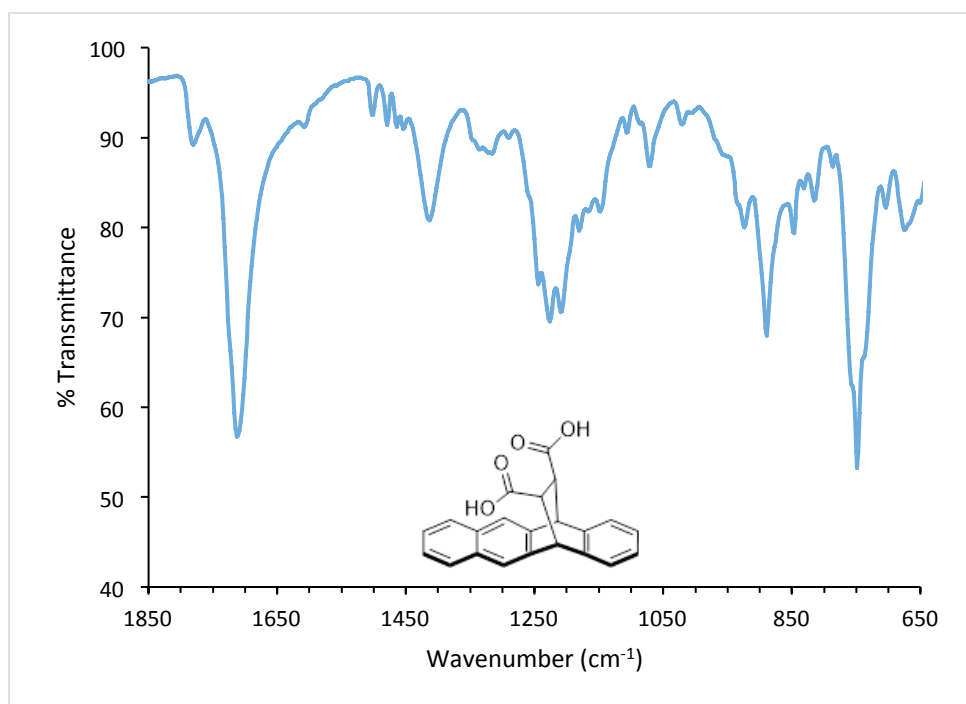

**Figure S1:** ATR-IR spectra of 5,12-dihydro-5,12-ethano-naphthacene-13,14-dicarboxylic acid (2).

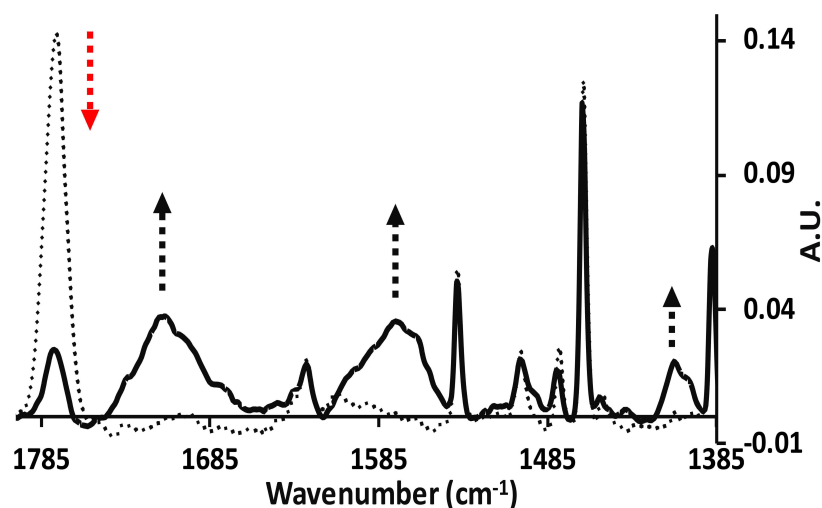

**Figure S2:** PM-IRRAS spectra of hydrolysis reaction of **1** (dotted line) to form the diacid **2** (solid line). A broad stretch at  $1561\text{ cm}^{-1}$ , along with a carbonyl stretch at  $1698\text{ cm}^{-1}$ , suggests the presence of more extensive hydrogen bonding in this sample. We attribute this feature to hydrogen bonding in the reacted films as typical diagnostic features, such as a shift in carbonyl frequencies along with the observation of stretch broadening,<sup>6–8</sup> are present. Typically, this occurs via one of two scenarios: in the first, the diacid bonds with excess water present, in the second, hydrogen bonding occurs intramolecularly. In order to investigate the former, the samples were exposed to vacuum ( $\sim 5 \times 10^{-6}$  Torr) for 2 h. A decrease in the stretch at  $1561\text{ cm}^{-1}$  was not observed. The same is true for films placed in a desiccator containing  $\text{P}_2\text{O}_5$  for several days. Thus, we believe the most likely explanation for this phenomenon is intramolecular hydrogen bonding, which is common for maleic acid and other analogues.<sup>8–11</sup>

### XPS Analysis of Cysteamine secondary reaction

Complimentary assessment with X-ray photoelectron spectroscopy (XPS), which is particularly effective at elemental and chemical analysis, provides a fuller picture of the formed products. Deconvolution of the O 1s and N 1s signals can provide an idea of the relative amounts of imide to acid amide. Within the O 1s signal (Figure S3a) are two peaks. The first, at 532.1 eV, has been attributed to a carbonyl oxygen while the second at 531.1 eV is assigned to a carboxylate which is commonly found at  $\sim 1$  eV lower binding energy than the uncharged oxygen.<sup>12</sup> Signal integration of these two components indicate that 22% of the surface oxygen is from a carboxylate while the remainder is a carbonyl. In a similar manner, deconvolution of the N 1s region yielded two peaks (Figure S3b). The first, with a binding energy of 399.8 eV is typical of uncharged amide and imide nitrogens.<sup>13</sup> The second peak at 401.3 eV, has been attributed to a charged amide from proton transfer and/or hydrogen bonding.<sup>13,14</sup> Signal integration of the two peaks yielded a ratio of 1.4:1, indicating that 41% of the surface species are charged. Taken together the N 1s and O 1s signals are suggestive of hydrogen bonding between the carboxylic acid and amide. Here it is assumed that nearly all the acid-amide is hydrogen bonding, based on similar analogues,<sup>15</sup> and as such this indicates that roughly 40% is acid amide, while the remaining 60% is imide. Using this information, the sulfur to oxygen ratio (1 to 2.3) can be used to estimate the amount of cysteamine that has bonded to each maleic anhydride. If 60% of the surface is imide **4a** (1 S: 2 O) and 40% of the surface is acid amide **4b** (1 S: 3 O) the expected ratio of signals is 1 to 2.4, almost identical to the measured amount. Any disulfide present is less than 10% of the species.

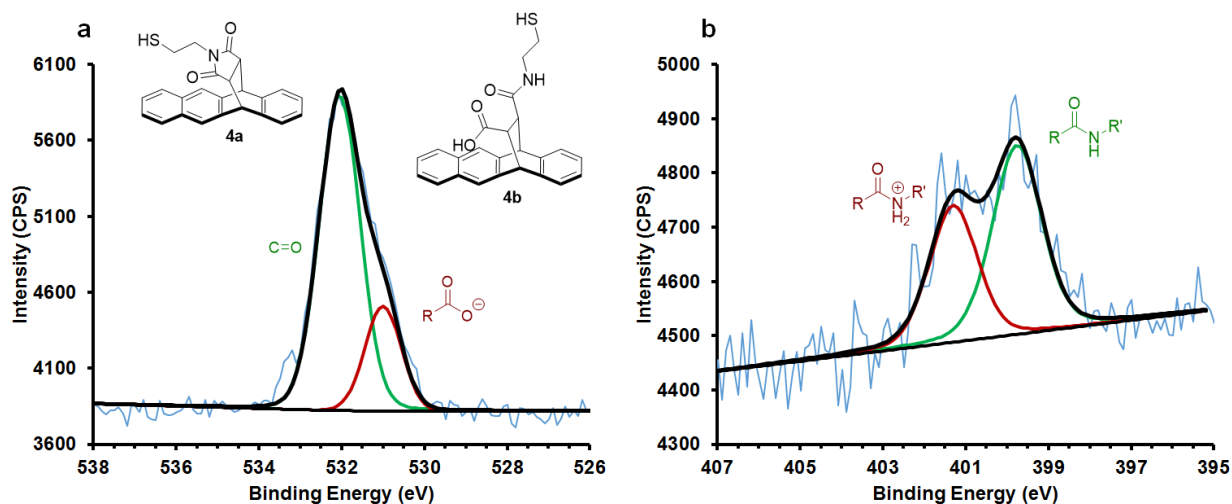

**Figure S3:** Deconvoluted XPS spectra of the (a) O 1s and (b) N 1s region for a cysteamine reacted thin-film. The green peaks are attributed to the neutral species while the peaks in red are assigned to charged/hydrogen bonded species. All peaks are reference to the C 1s signal at 284.6 eV. Discussion of these signals is above.



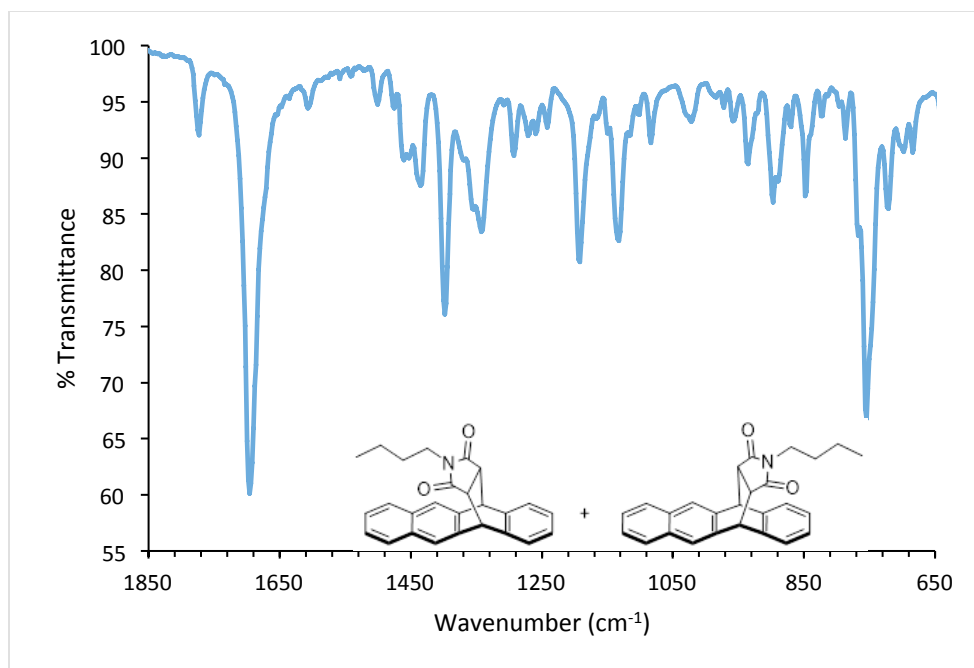

**Figure S4:** ATR-IR spectra of **3a**.

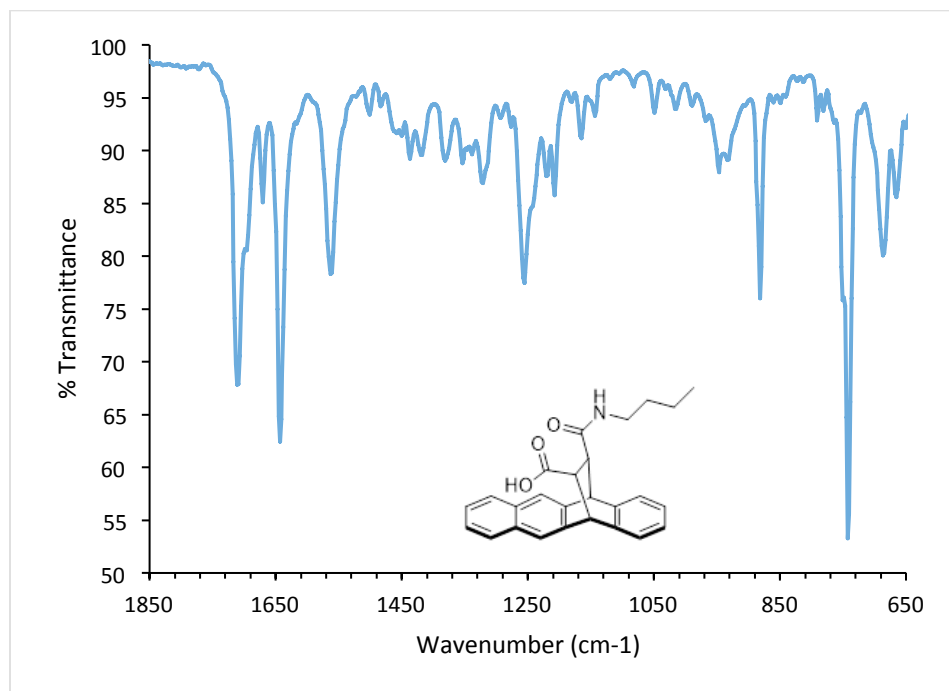

**Figure S5:** ATR-IR spectra of **3b**.

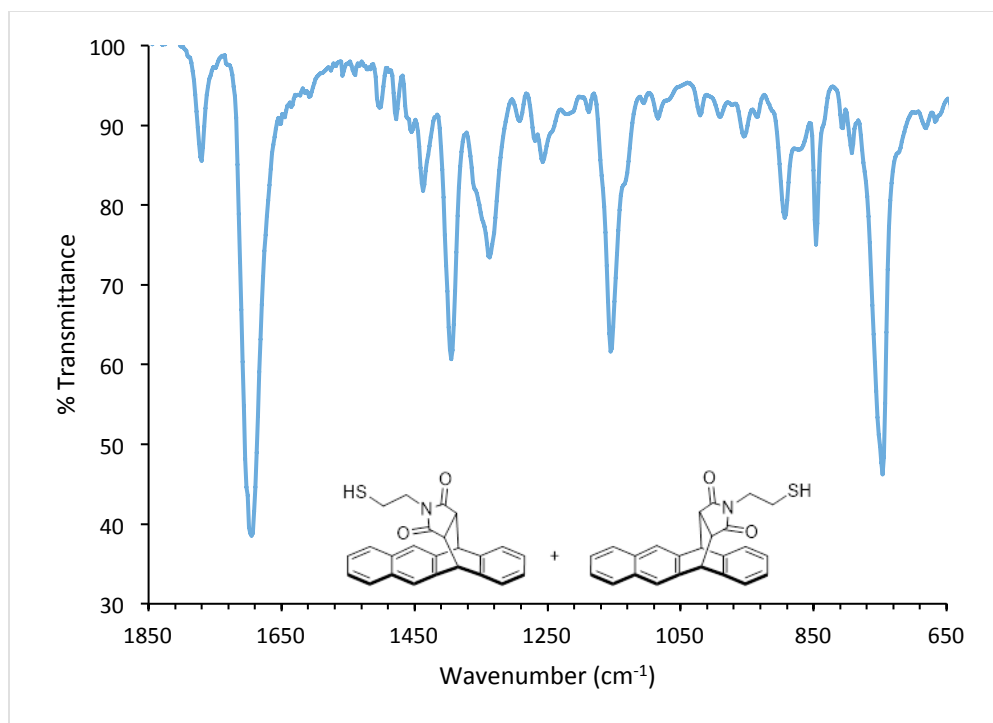

**Figure S6:** ATR-IR spectra of **4a**.

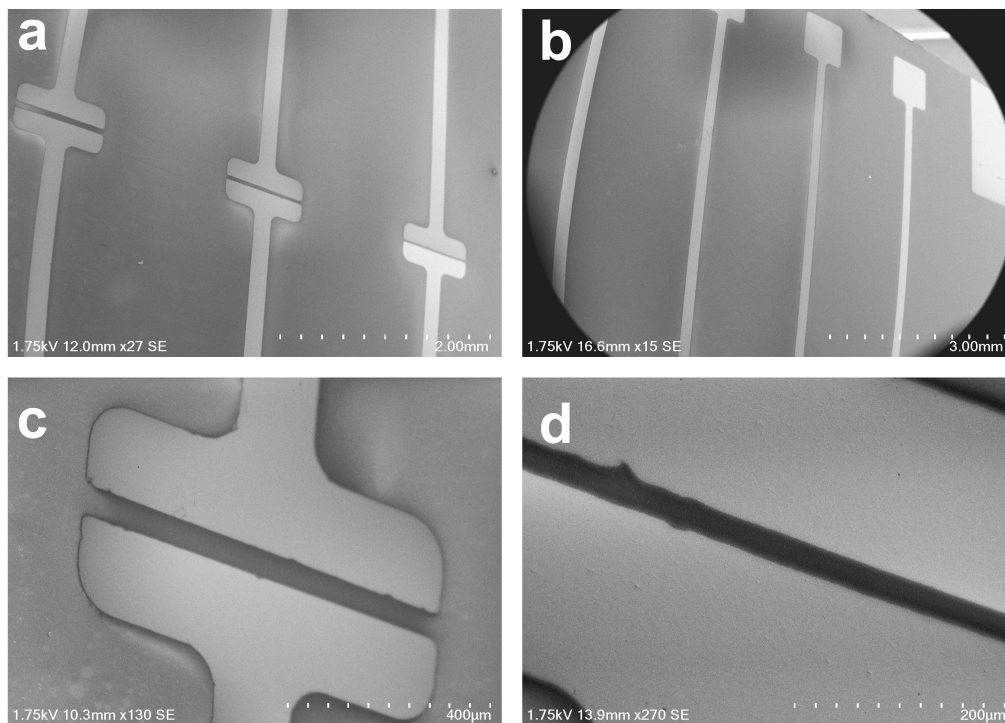

**Figure S7:** (a-d) Additional SEM images of Ag electrodes deposited onto unreacted tetracene (150 nm) on a gold coated PET substrate. All SEM image are *before* bending and were imaged at an acceleration voltage of 1.75 kV and tilted 70°.

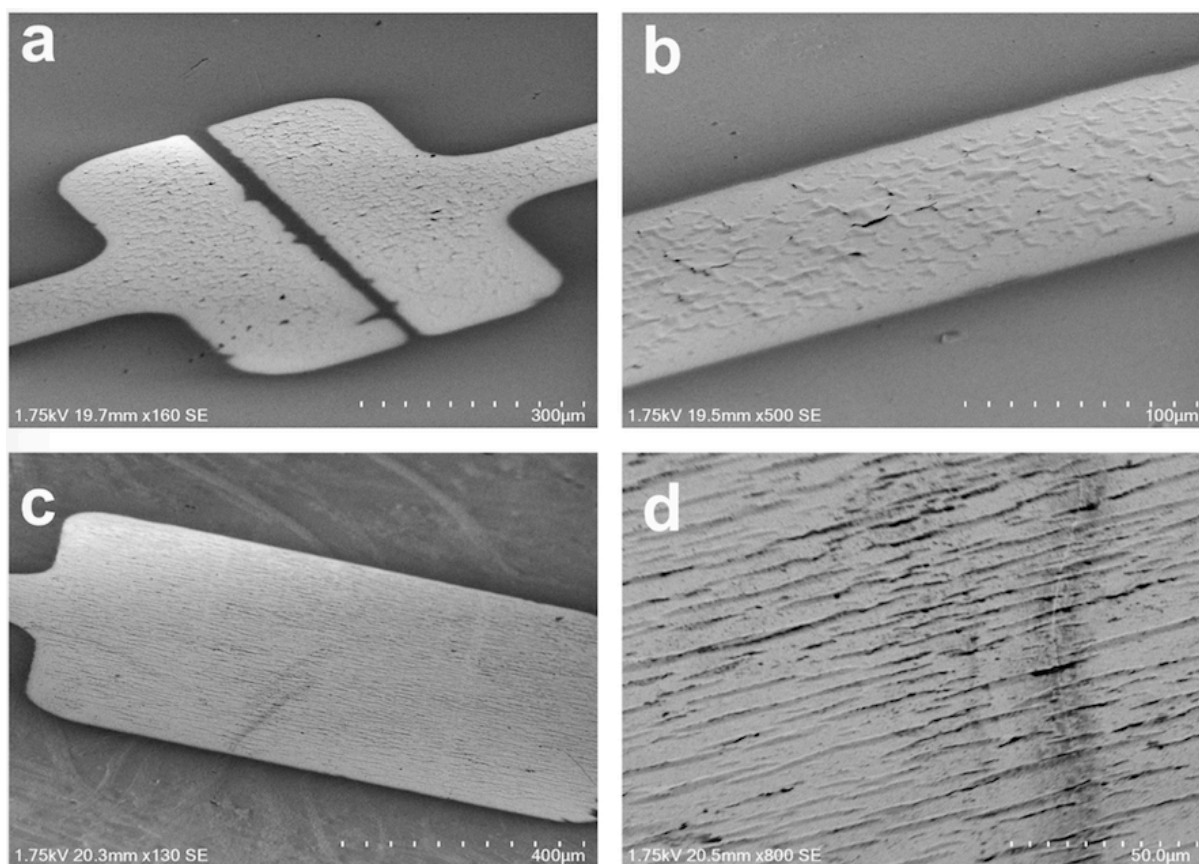

**Figure S8:** (a-d) Additional SEM images of Ag electrodes deposited onto unreacted tetracene (150 nm) on a gold coated PET substrate. All SEM image are *after* 50 bending cycles and were imaged at an acceleration voltage of 1.75 kV and tilted 70°.

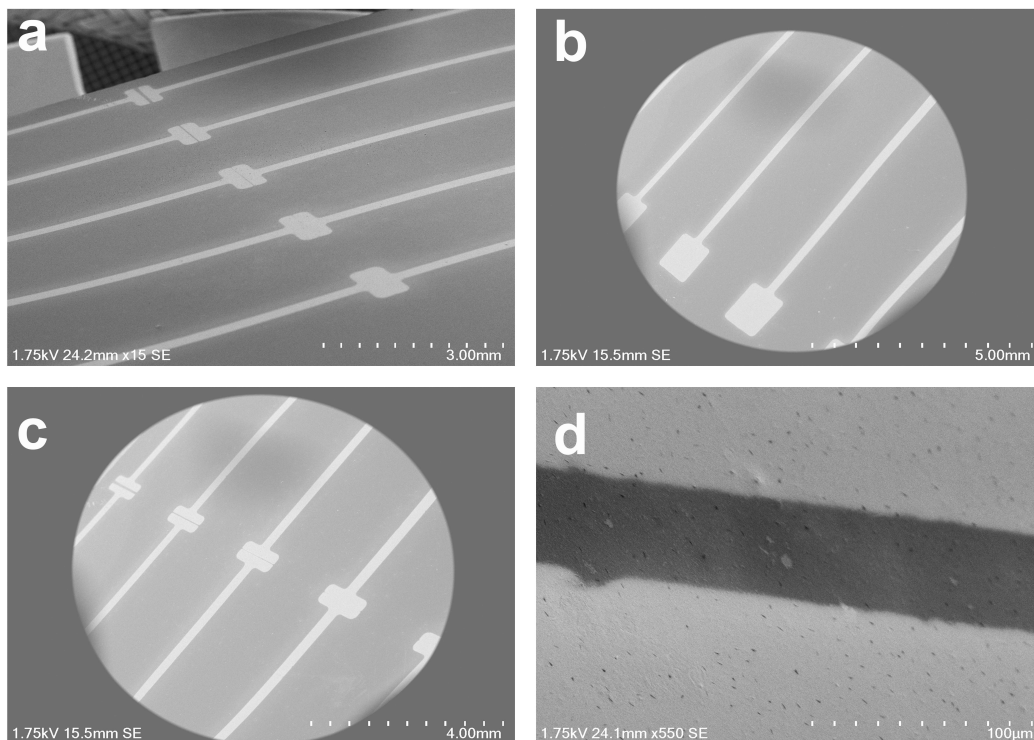

**Figure S9:** (a-d) Additional SEM images of Ag electrodes deposited onto reacted tetracene (150 nm) on a gold coated PET substrate. The reaction consists of, first, maleic anhydride precursor formation followed by cysteamine reaction. All SEM image are *before* bending and were imaged at an acceleration voltage of 1.75 kV and tilted 70°.

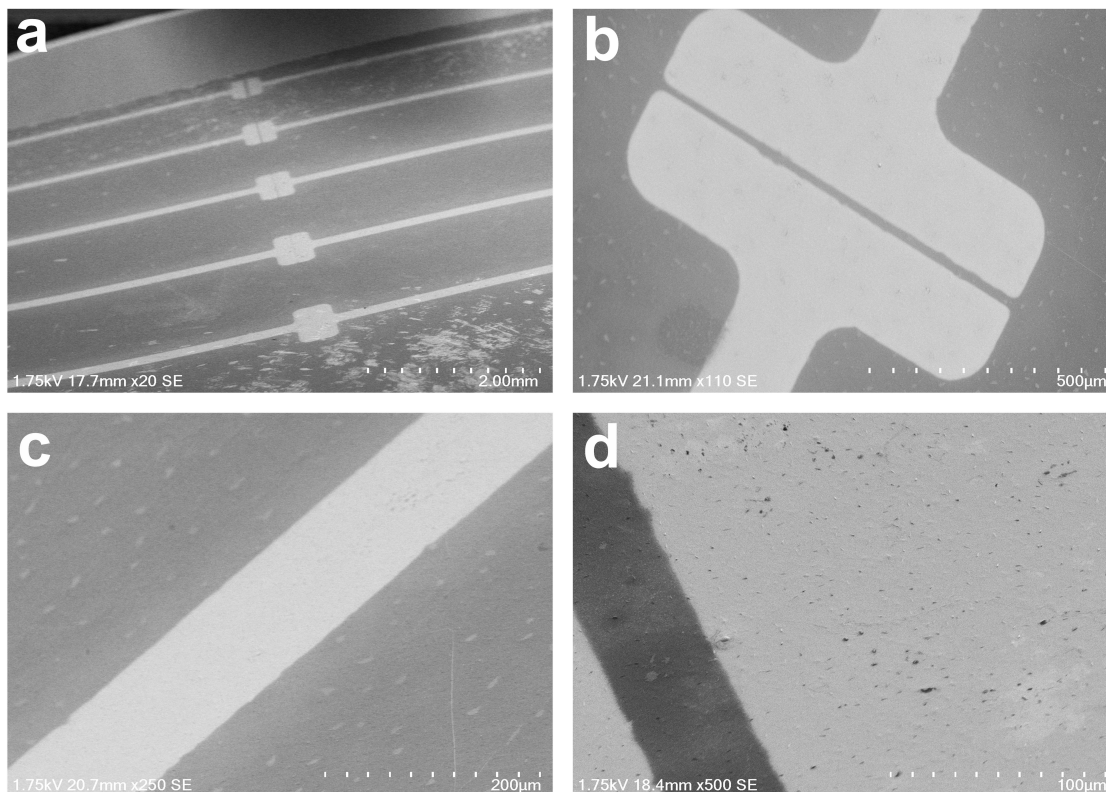

**Figure S10:** (a-d) Additional SEM images of Ag electrodes deposited onto reacted tetracene (150 nm) on a gold coated PET substrate. The reaction consists of, first, maleic anhydride precursor formation followed by cysteamine reaction. All SEM image are *after* 100 bending cycles and were imaged at an acceleration voltage of 1.75 kV and tilted 70°. White areas visible on the side of (a) are due to handling damage during the bending test.

STANDARD PROTON PARAMETERS  
Pulse Sequence: szpul

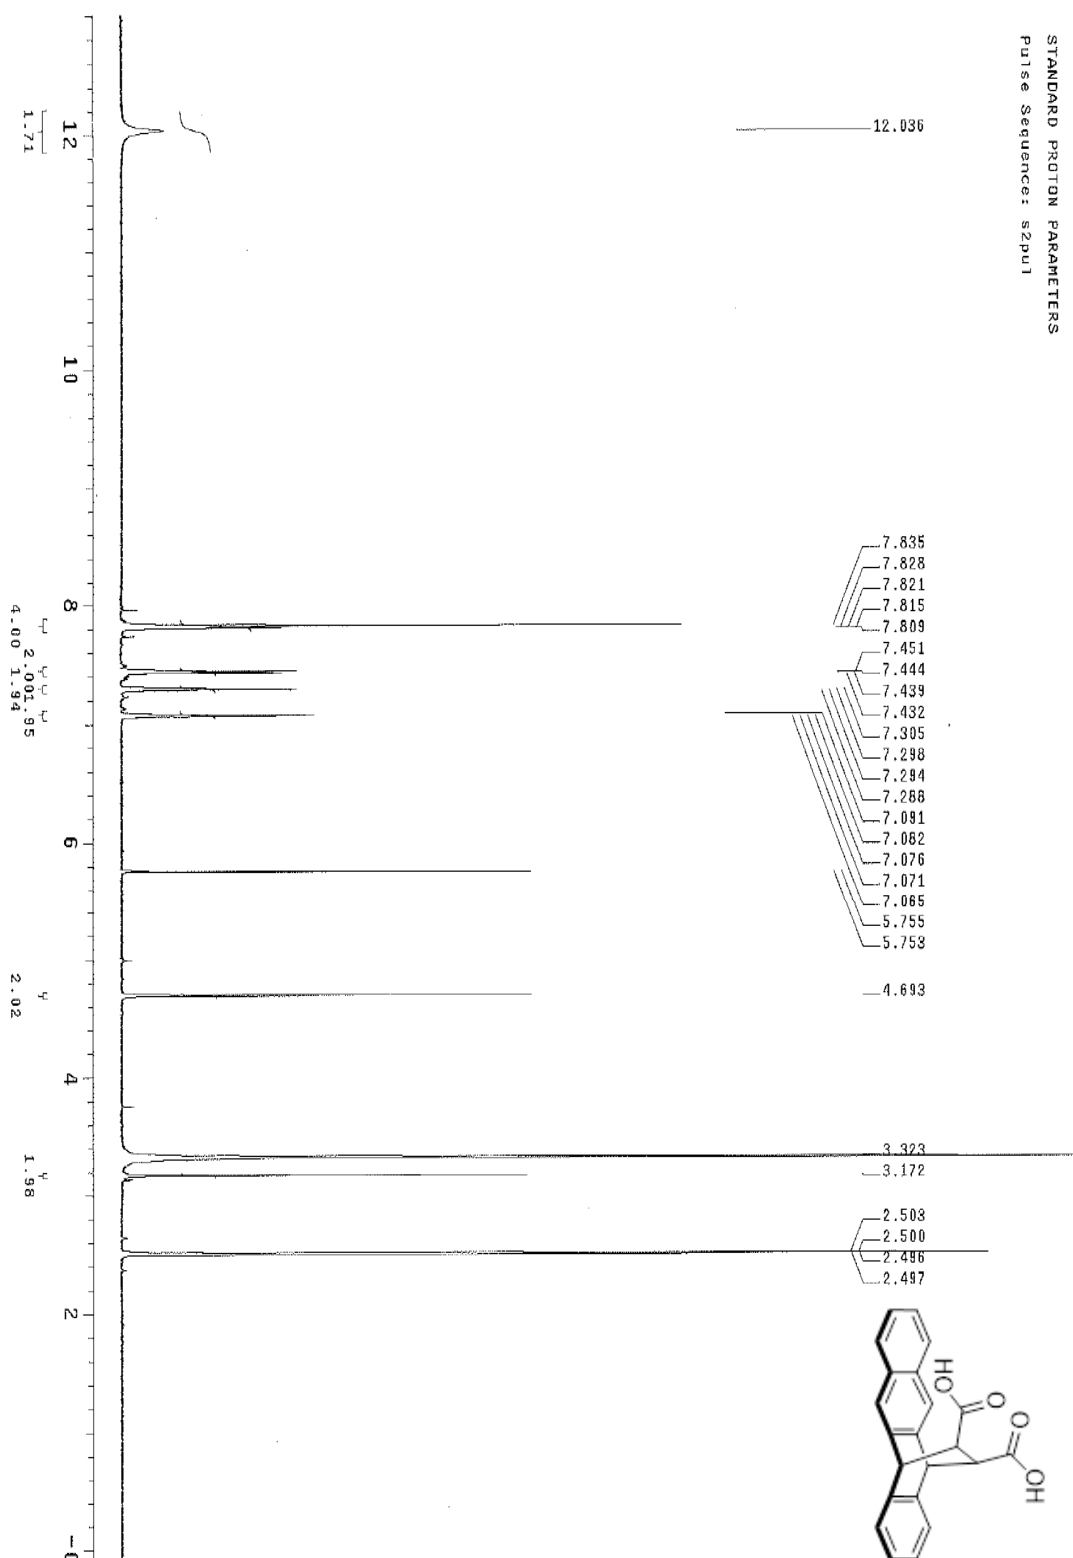

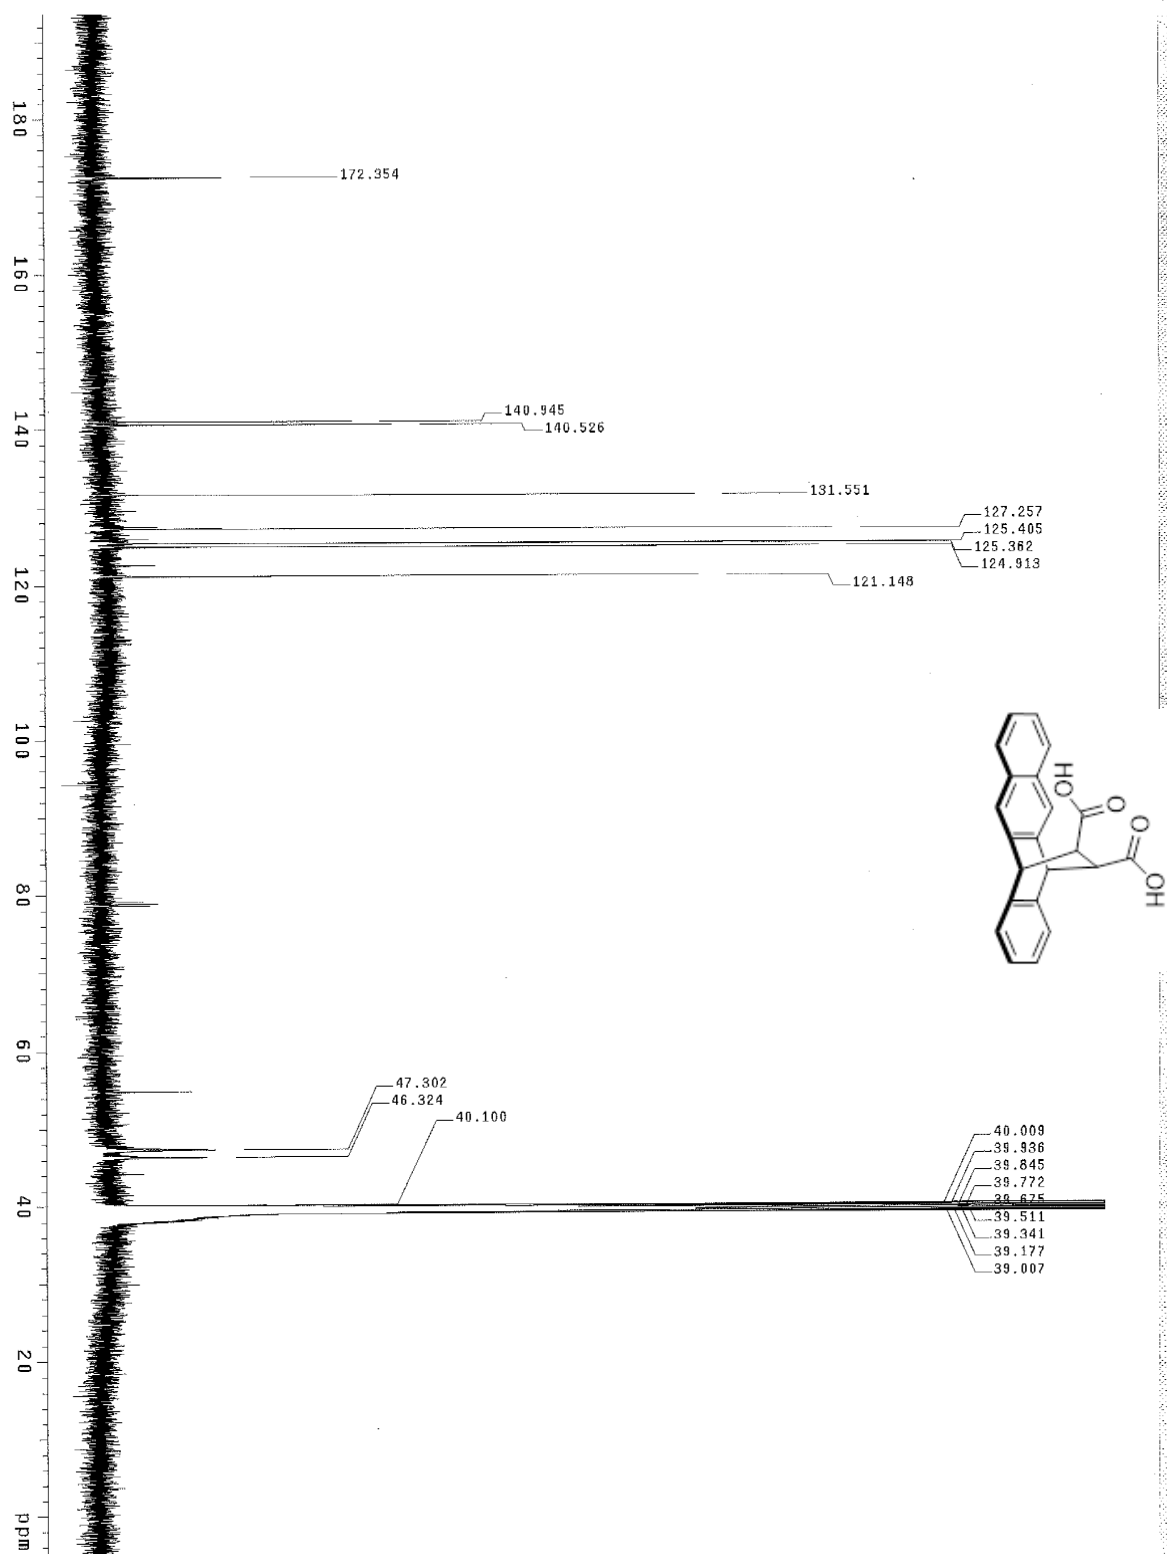



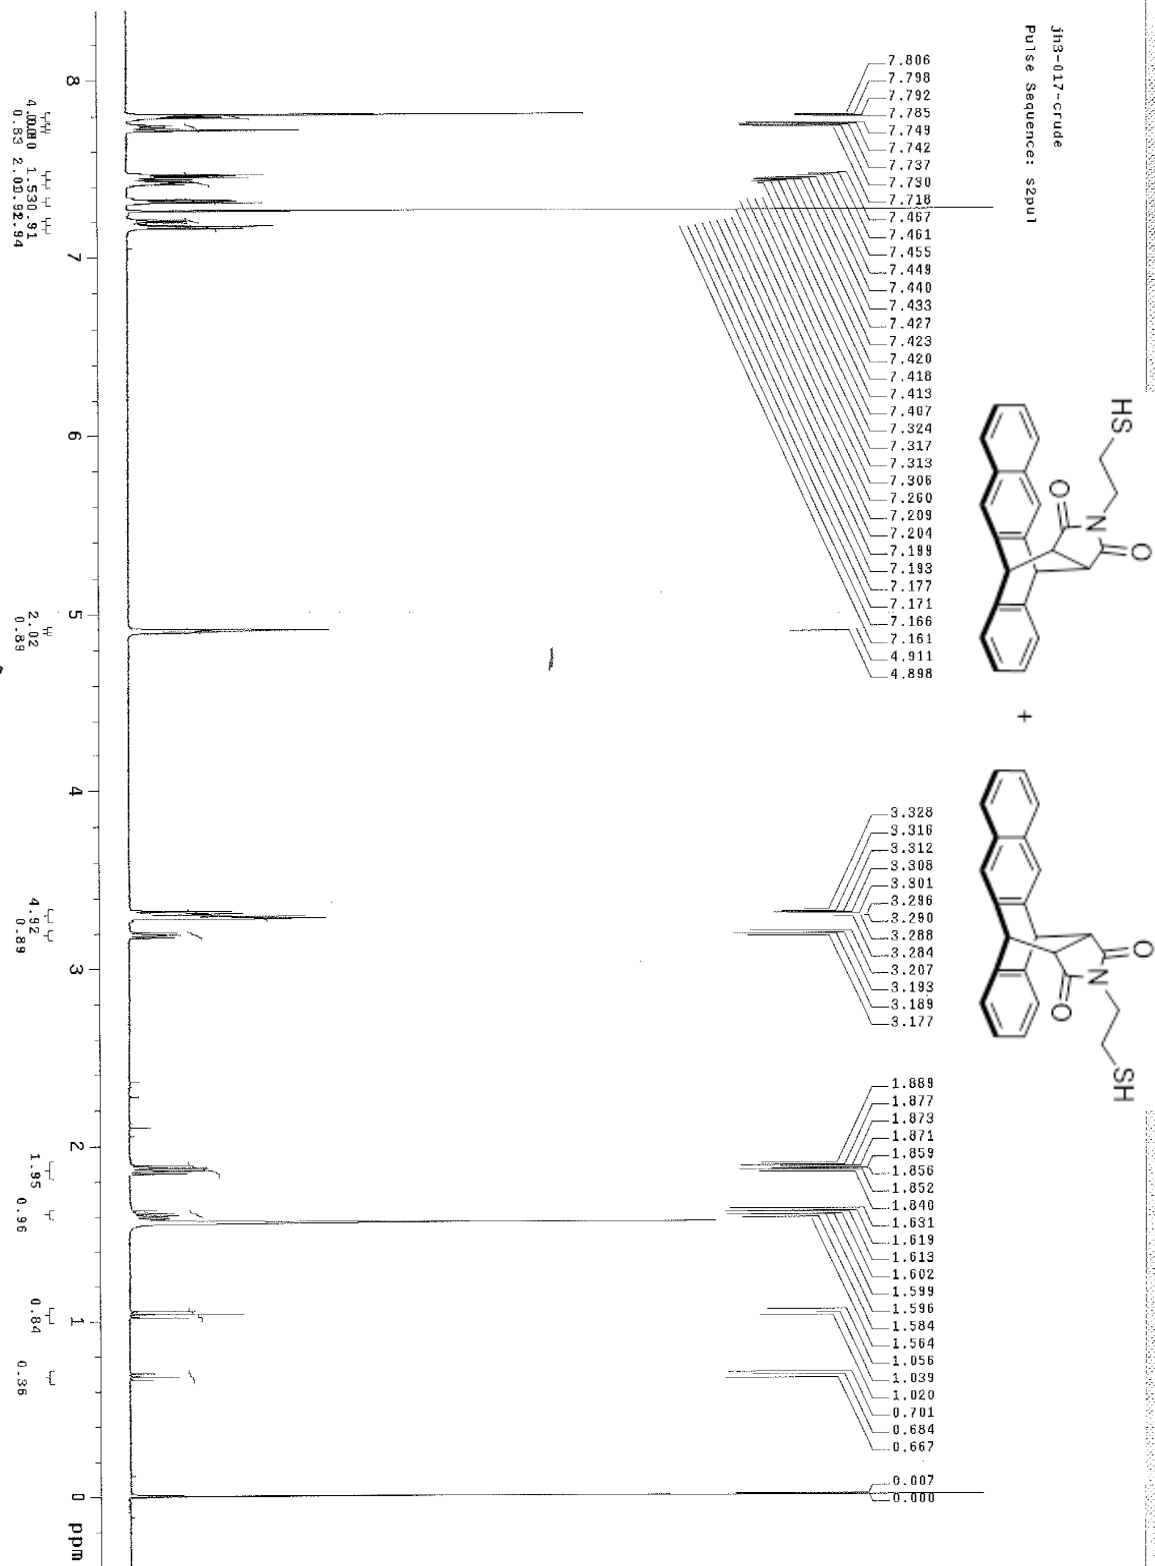

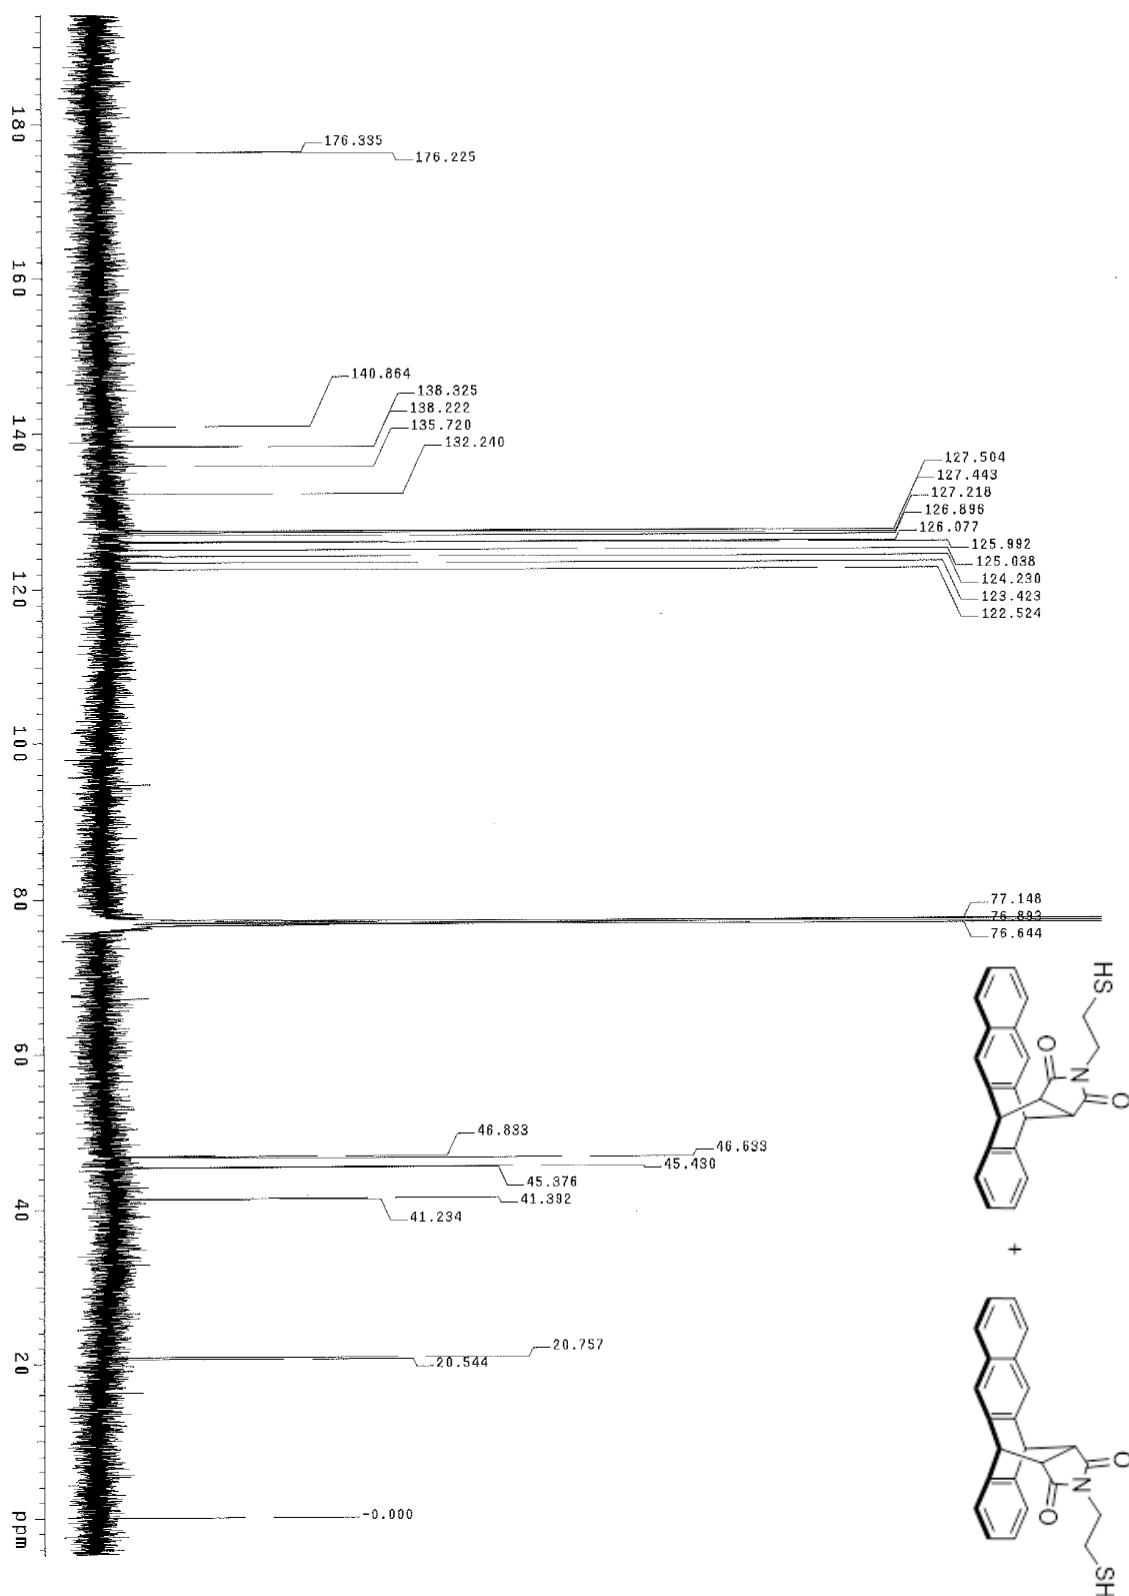

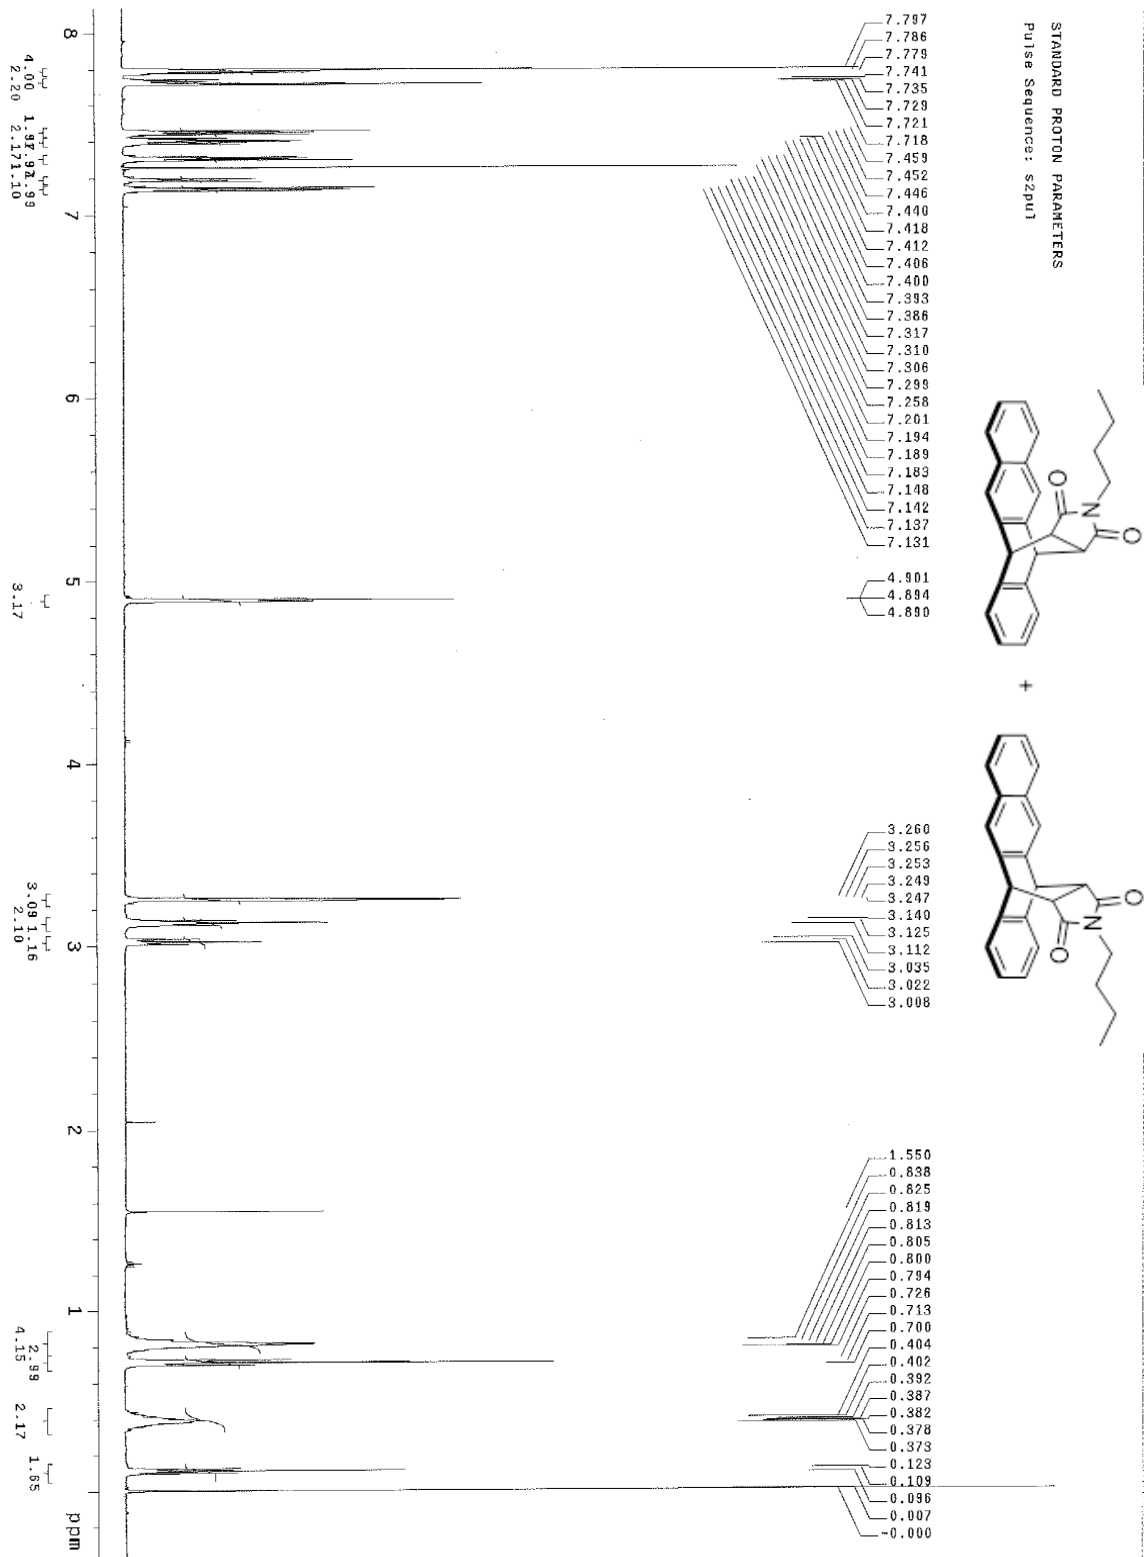

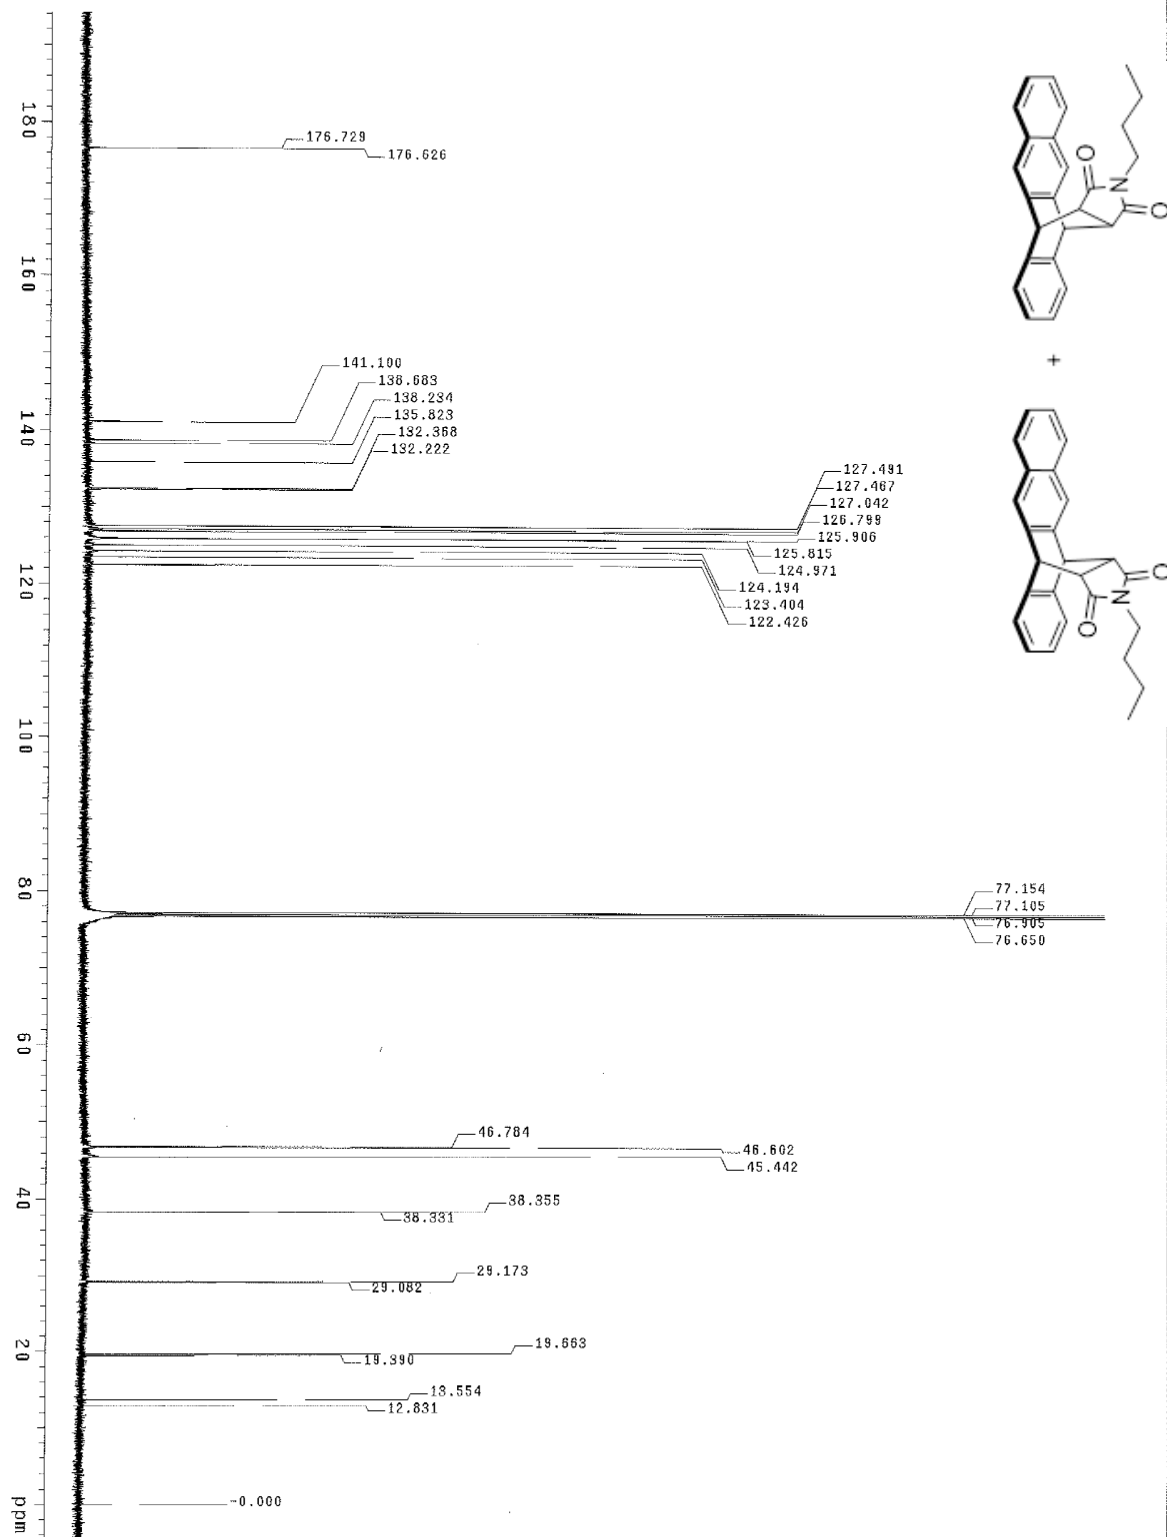

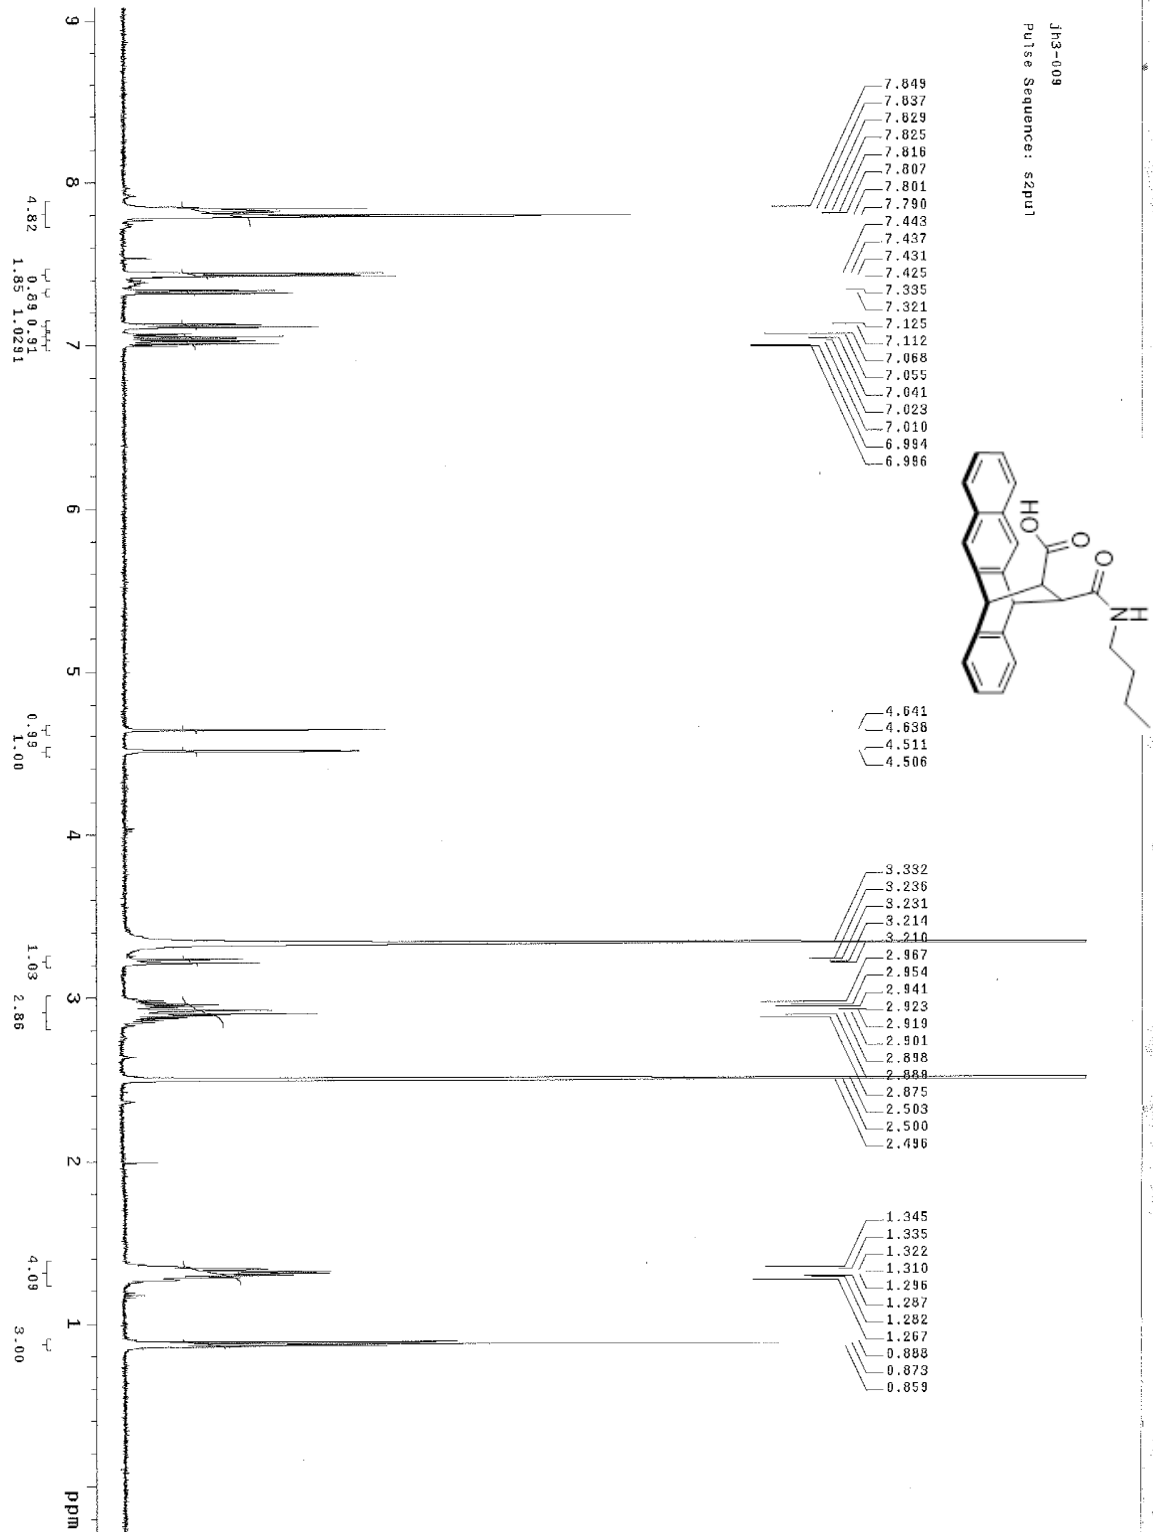

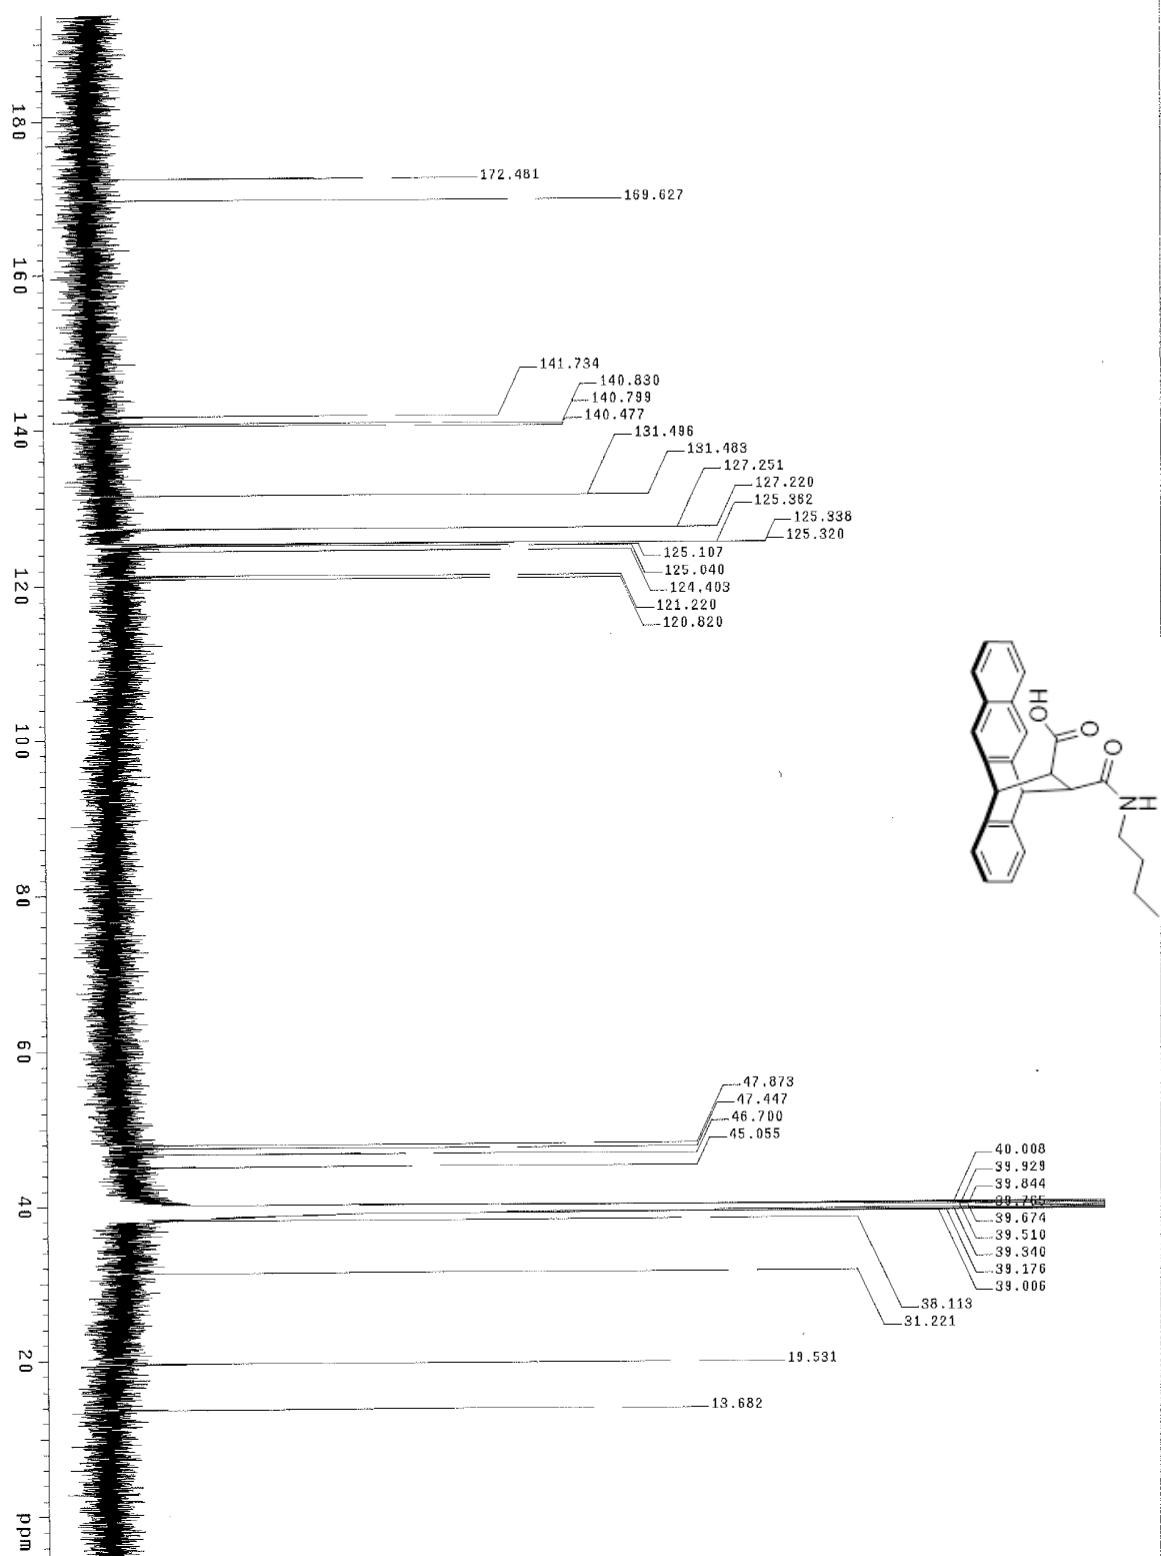

## XPS Survey Scan

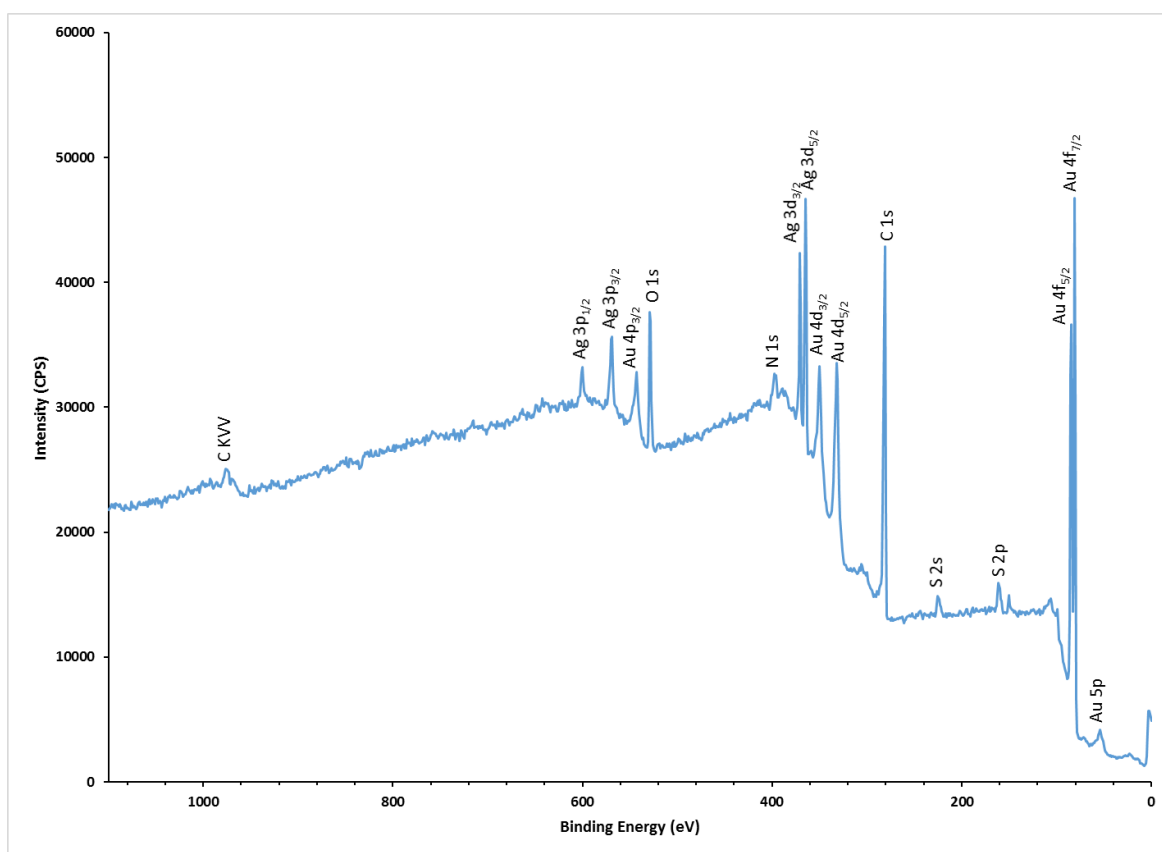

## XPS of C 1s Region

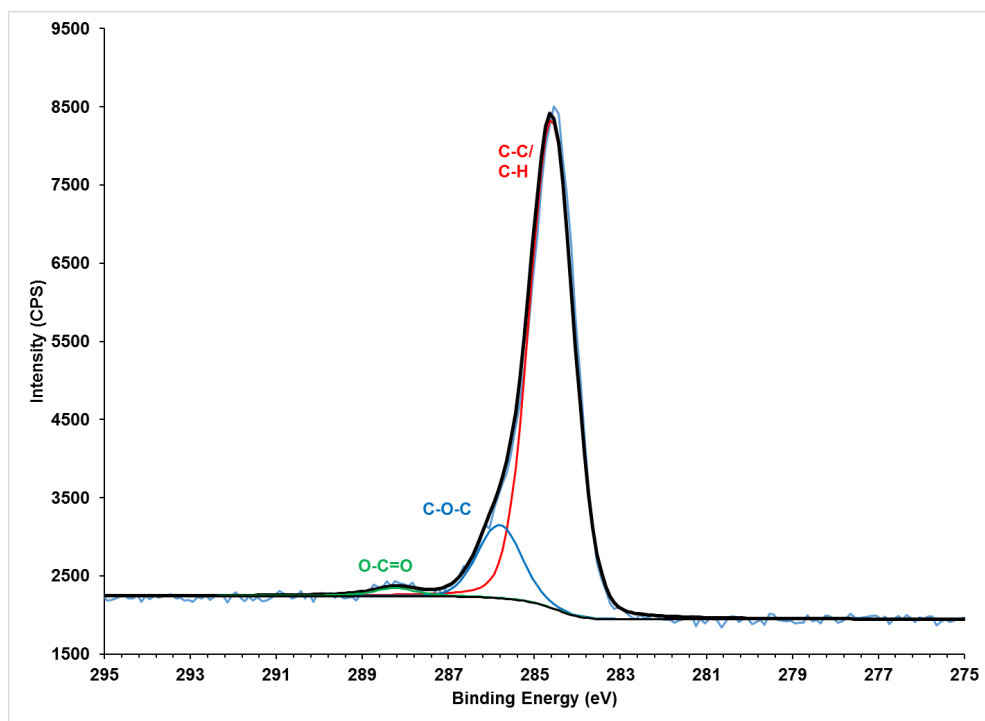

## XPS of S 2p Region

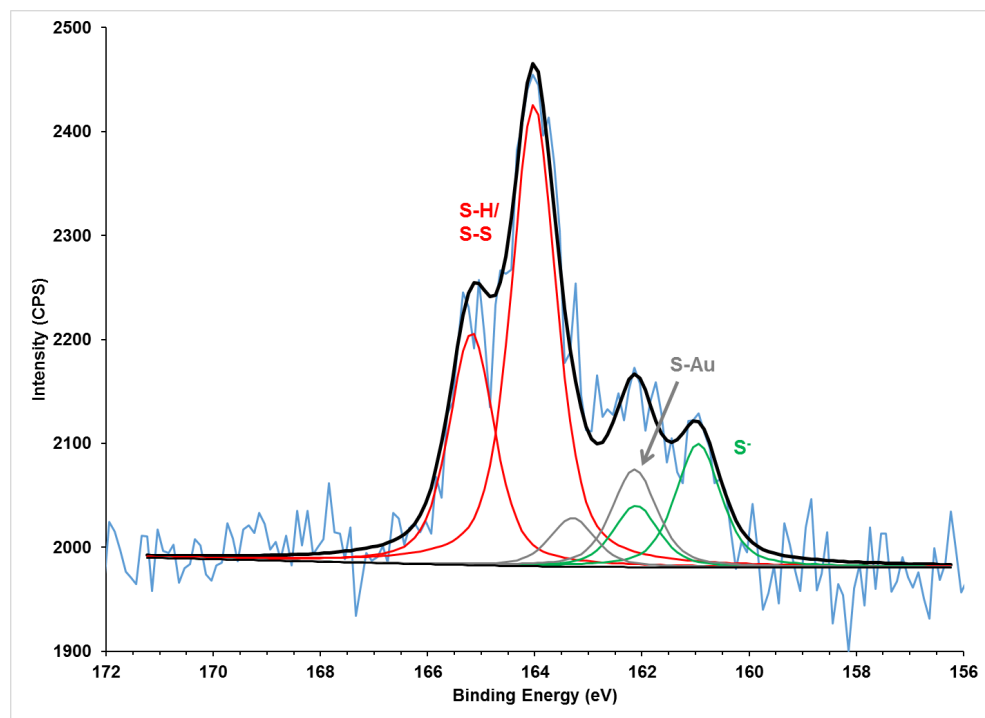



## References

- 1 S. Piranej, D. A. Turner, S. M. Dalke, H. Park, B. A. Qualizza, J. Vicente, J. Chen and J. W. Ciszek, *CrystEngComm*, 2016, **18**, 6062–6068.
- 2 J.-C. Dupin, D. Gonbeau, P. Vinatier and A. Levasseur, *Phys. Chem. Chem. Phys.*, 2000, **2**, 1319–1324.
- 3 J. Lee, T. Han, M. Park, D. Y. Jung, J. Seo, H. Seo, H. Cho, E. Kim, J. Chung, S. Chuoi, T. Kim, T. Lee, S. Yoo, *Nat. Commun.*, 2016, **7**, 11791.
- 4 G. R. Fulmer, A. J. M. Miller, N. H. Sherden, H. E. Gottlieb, A. Nudelman, B. M. Stoltz, J. E. Bercaw and K. I. Goldberg, *Organometallics*, 2010, **29**, 2176–2179.
- 5 B. A. Qualizza, S. Prasad, M. P. Chiarelli and J. W. Ciszek, *Chem. Commun.*, 2013, **49**, 4495–4497.
- 6 J. Emsley, *Chem. Soc. Rev.*, 1980, **9**, 91–124.
- 7 T. Zeegers-Huyskens and L. Sobczyk, *J. Mol. Liq.*, 1990, **46**, 263–284.
- 8 S. Kawaguchi, T. Kitano and K. Ito, *Macromolecules*, 1991, **24**, 6030–6036.
- 9 L. Ebersson, *Acta Chem. Scand.*, 1959, **13**, 224–235.
- 10 M. Ilczyszyn, D. Godzisz and M. M. Ilczyszyn, *Spectrochim. Acta. A. Mol. Biomol. Spectrosc.*, 2003, **59**, 1815–1828.
- 11 H. M. E. Cardwell, J. D. Dunitz and L. E. Orgel, *J. Chem. Soc.*, 1953, **0**, 3740–3742.
- 12 S. Stepanow, T. Strunskus, M. Lingenfelder, A. Dmitriev, H. Spillmann, N. Lin, J. V. Barth, C. Wöll and K. Kern, *J. Phys. Chem. B*, 2004, **108**, 19392–19397.
- 13 R. J. J. Jansen and H. van Bekkum, *Carbon*, 1995, **33**, 1021–1027.
- 14 J. S. Stevens, S. J. Byard, C. C. Seaton, G. Sadiq, R. J. Davey and S. L. M. Schroeder, *Phys. Chem. Chem. Phys.*, 2013, **16**, 1150–1160.
- 15 R. Francis, P. Raghavaiah and K. Pius, *Acta Crystallogr. Sect. B Struct. Sci. Cryst. Eng. Mater.*, 2014, **70**, 942–947.
